# Supplementary material for: Regional differences in dosage compensation on the chicken Z chromosome
Source: PubMed Central journal article supplement (PMC2375040; doi:10.1186/gb-2007-8-9-r202), 2007-09-27
Supplement: gb-2007-8-9-r202-S6.pdf [file gb-2007-8-9-r202-S6.pdf]

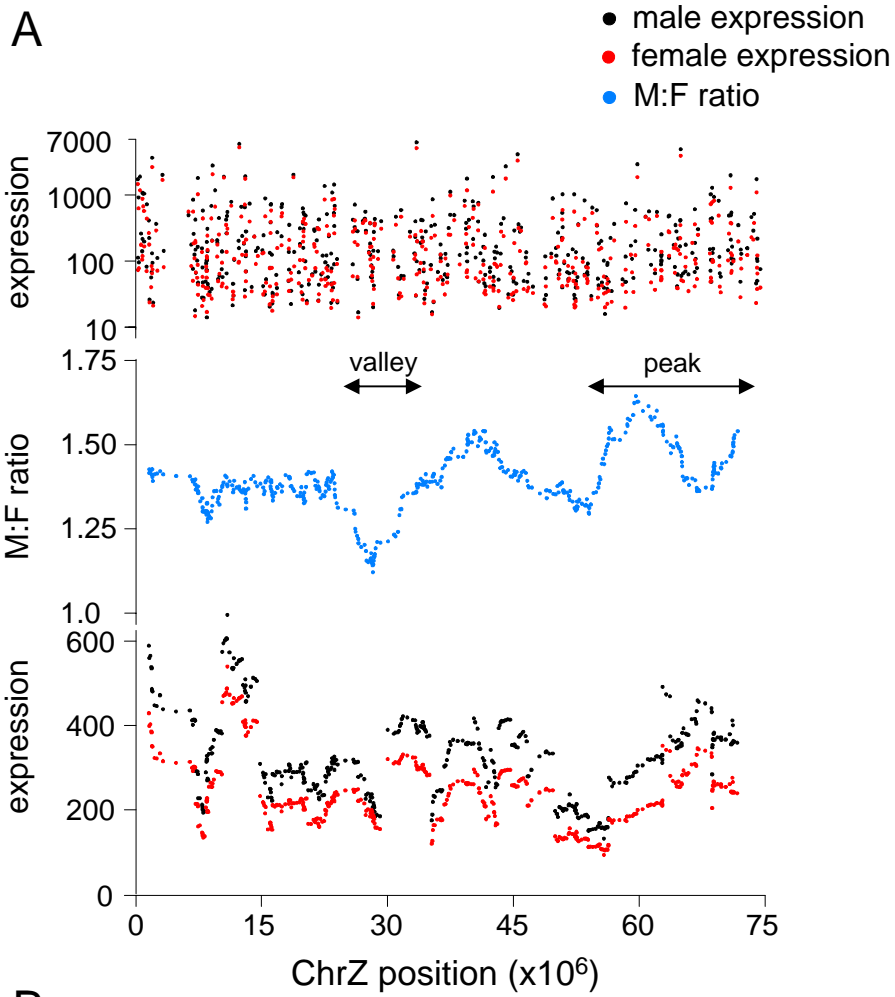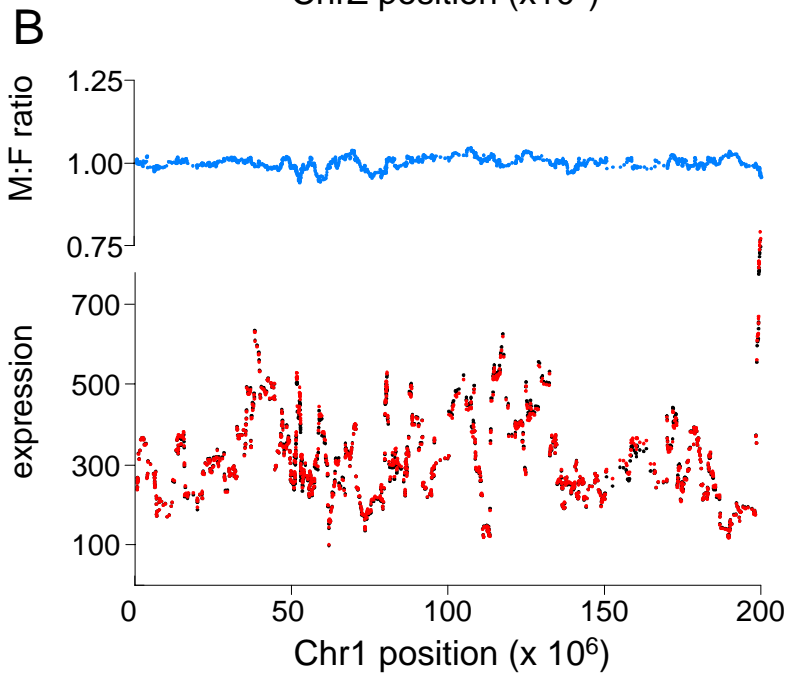

Supplementary  
Figure 1
